# Supplementary material for: Modification of Magnetite Nanoparticles with Triazine-Based Dendrons and Their Application as Drug-Transporting Systems
Source: MDPI journal article supplement (doi:10.3390/ijms222111353), 2021-10-21
Supplement: s1 [file s1]

# Modification of Magnetite Nanoparticles with Triazine-Based Dendrons and Their Application as Drug-Transporting Systems

Mateusz Pawlaczyk \* and Grzegorz Schroeder

Faculty of Chemistry, Adam Mickiewicz University in Poznań, Uniwersytetu Poznańskiego 8, 61-614 Poznań, Poland; schroede@amu.edu.pl

\* Correspondence: mateusz.pawlaczyk@amu.edu.pl; Tel.: +48-618291797

## Supplementary Information

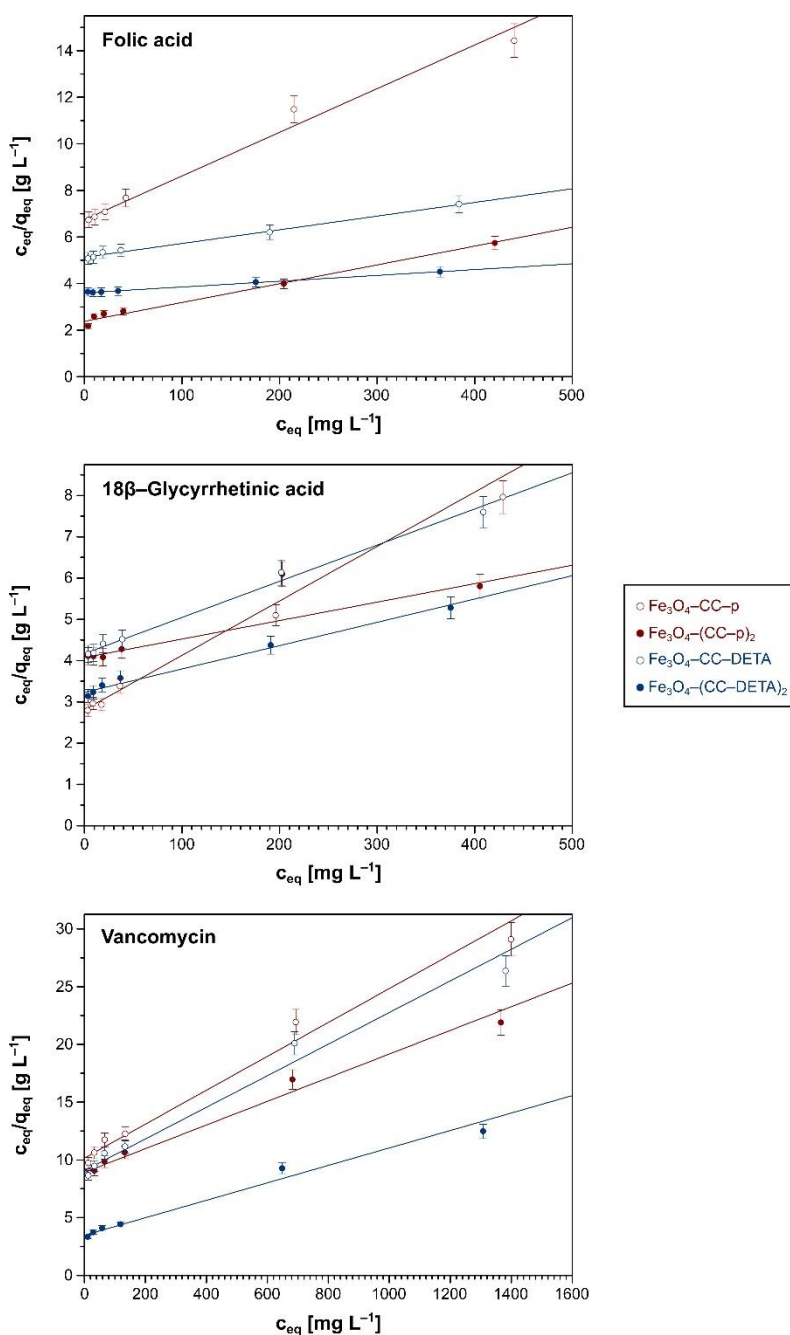

Figure S1. The fitting of the experimental data of isothermal studies to the Langmuir model.

**Table S1.** The parameters of the biocompound releases from the materials functionalized with triazine dendrons of generation G2 ( $\text{Fe}_3\text{O}_4\text{-(CC-p)}_2$  and  $\text{Fe}_3\text{O}_4\text{-(CC-DETA)}_2$ ) in pH 2.0 and pH 7.4, calculated for the zero-order, the first-order, and the Hixson–Crowell release models.

| Adsorbent                    |                                            | First-order model                        |                | Zero-order model                          |                | Hixson–Crowell model                                                |                |
|------------------------------|--------------------------------------------|------------------------------------------|----------------|-------------------------------------------|----------------|---------------------------------------------------------------------|----------------|
|                              |                                            | $k_1 \cdot 10^2$<br>(% h <sup>-1</sup> ) | R <sup>2</sup> | $k_0 \cdot 10^3$<br>(mg h <sup>-1</sup> ) | R <sup>2</sup> | $k_{\text{H-C}} \cdot 10^2$<br>(mg <sup>1/3</sup> h <sup>-1</sup> ) | R <sup>2</sup> |
| <b>Folic acid</b>            |                                            |                                          |                |                                           |                |                                                                     |                |
| pH 2.0                       | $\text{Fe}_3\text{O}_4\text{-(CC-p)}_2$    | 0.48 ± 0.11                              | 0.7840         | 0.41 ± 0.11                               | 0.7025         | 0.07 ± 0.02                                                         | 0.6763         |
|                              | $\text{Fe}_3\text{O}_4\text{-(CC-DETA)}_2$ | 0.56 ± 0.13                              | 0.7763         | 0.60 ± 0.18                               | 0.6833         | 0.06 ± 0.02                                                         | 0.6637         |
| pH 7.4                       | $\text{Fe}_3\text{O}_4\text{-(CC-p)}_2$    | 0.31 ± 0.14                              | 0.4766         | 0.62 ± 0.32                               | 0.4188         | 0.12 ± 0.07                                                         | 0.3702         |
|                              | $\text{Fe}_3\text{O}_4\text{-(CC-DETA)}_2$ | 0.49 ± 0.19                              | 0.5301         | 0.81 ± 0.40                               | 0.4515         | 0.14 ± 0.08                                                         | 0.3996         |
| <b>18β-glycyrrhetic acid</b> |                                            |                                          |                |                                           |                |                                                                     |                |
| pH 2.0                       | $\text{Fe}_3\text{O}_4\text{-(CC-p)}_2$    | 0.61 ± 0.21                              | 0.6055         | 0.79 ± 0.34                               | 0.5192         | 0.11 ± 0.05                                                         | 0.4883         |
|                              | $\text{Fe}_3\text{O}_4\text{-(CC-DETA)}_2$ | 0.58 ± 0.26                              | 0.4958         | 0.92 ± 0.53                               | 0.3741         | 0.09 ± 0.05                                                         | 0.3462         |
| pH 7.4                       | $\text{Fe}_3\text{O}_4\text{-(CC-p)}_2$    | 0.56 ± 0.13                              | 0.7819         | 1.26 ± 0.37                               | 0.6983         | 0.26 ± 0.09                                                         | 0.5966         |
|                              | $\text{Fe}_3\text{O}_4\text{-(CC-DETA)}_2$ | 0.56 ± 0.14                              | 0.7664         | 2.75 ± 0.85                               | 0.6749         | 0.30 ± 0.11                                                         | 0.5834         |
| <b>Vancomycin</b>            |                                            |                                          |                |                                           |                |                                                                     |                |
| pH 2.0                       | $\text{Fe}_3\text{O}_4\text{-(CC-p)}_2$    | 1.05 ± 0.29                              | 0.7209         | 1.82 ± 0.70                               | 0.5759         | 0.13 ± 0.05                                                         | 0.5509         |
|                              | $\text{Fe}_3\text{O}_4\text{-(CC-DETA)}_2$ | 0.98 ± 0.20                              | 0.8268         | 1.47 ± 0.47                               | 0.6626         | 0.06 ± 0.02                                                         | 0.6493         |
| pH 7.4                       | $\text{Fe}_3\text{O}_4\text{-(CC-p)}_2$    | 0.58 ± 0.19                              | 0.6563         | 1.66 ± 0.66                               | 0.5588         | 0.17 ± 0.07                                                         | 0.5102         |
|                              | $\text{Fe}_3\text{O}_4\text{-(CC-DETA)}_2$ | 0.42 ± 0.16                              | 0.5944         | 2.32 ± 1.02                               | 0.5088         | 0.12 ± 0.06                                                         | 0.4803         |
